# Supplementary material
Source: publisher figshare collection journal article supplement (https://karger.figshare.com/ndownloader/files/14107652)
Supplement: Supplementary file 1 [file 14107652]

Supplemental Table 1. Subgroup analyses (Diquafosol versus control eye drop type)

| variale | Subgroup analyses | Number studies | Number of participants | Effect estimate(Random) | I2 |
| --- | --- | --- | --- | --- | --- |
| Schirmer(WMD) | All | 4 | 432 | 0.74(0.24,1.24) | 0% |
| 0.1% HA | 3 | 258 | 0.67(0.15,1.18) | 0% |
| Other comparator except 0.1% HA | 2 | 174 | 1.99(-0.11,4.08) | 0% |
| BUT(WMD) | All | 8 | 1186 | 0.74(0.40,1.09) | 99% |
| 0.1% HA | 4 | 747 | 0.65(0.25,1.05) | 82% |
| Other comparator except 0.1% HA | 4 | 429 | 1.01(-0.02,2.04) | 98% |
| Fluorescein staining score  　(SMD) | All | 9 | 1434 | 1.14(0.35,1.92) | 98% |
| 0.1% HA | 5 | 1005 | 0.81(0.13,1.49) | 96% |
| Other comparator except 0.1% HA | 4 | 459 | 1.52(-0.67,3.71) | 98% |
| Rose Belngal staining  　(WMD) | All | 6 | 1195 | 0.76(0.40,1.13) | 98% |
| 0.1% HA | 5 | 1005 | 0.67(0.37,0.97) | 90% |
| Other comparator except 0.1% HA | 1 | 190 | 0.94(0.88,1.00) | - |

WMD = weighted mean difference ; SMD = standardized mean difference ; HA = hyaluronic acid
